# Supplementary material for: The E3 ligase VHL controls alveolar macrophage function via metabolic–epigenetic regulation
Source: PubMed Central journal article supplement — J Exp Med. 2018 Dec 3;215(12):3180–93. doi: 10.1084/jem.20181211 (PMC6279396; doi:10.1084/jem.20181211), 2018-12-03
Supplement: JEM_20181211_sm.pdf [file JEM_20181211_sm.pdf]

Supplemental material

Zhang et al., <https://doi.org/10.1084/jem.20181211>

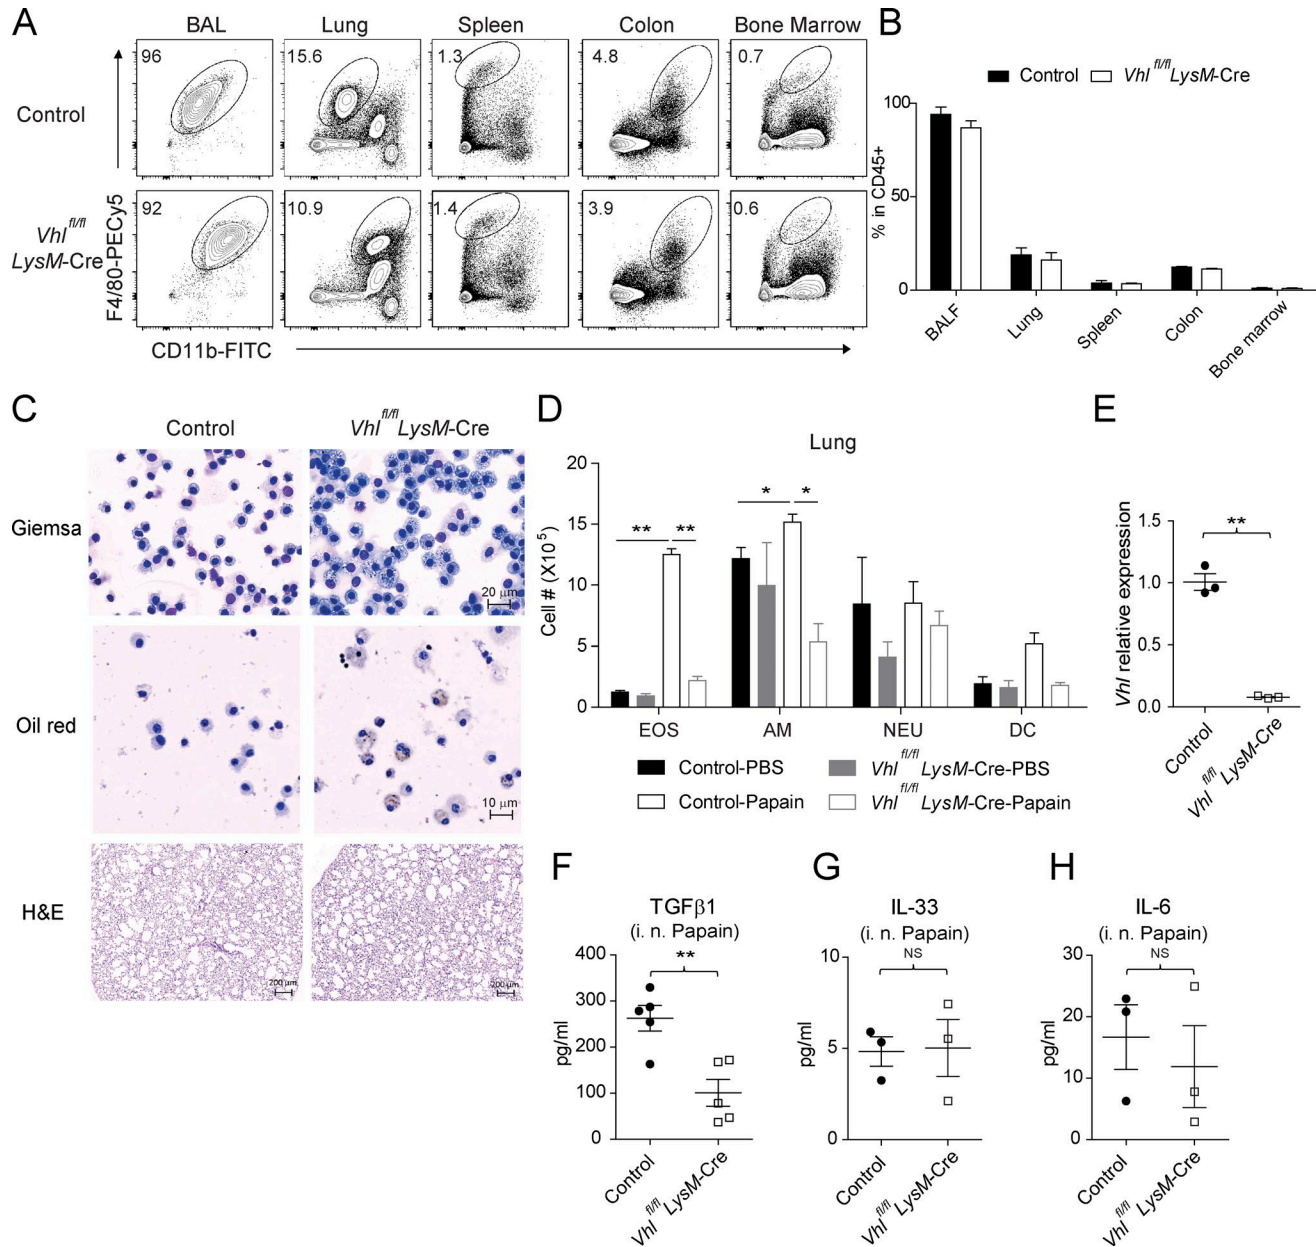

Figure S1. **VHL deficiency affects AMs.** Related to Fig. 1. **(A)** Expression of F4/80 and CD11b among CD45<sup>+</sup> cells in the indicated tissues. **(B)** Frequency of cells gated as shown in A. **(C)** Cytospin photograph of BAL cells stained with Giemsa or Oil Red (top and middle). Bars, 20 μm or 10 μm, respectively. Representative H&E staining of lung sections (bottom). Bar, 200 μm. **(D)** Absolute numbers of CD11b<sup>+</sup> CD11c<sup>-</sup> SiglecF<sup>+</sup> eosinophils (EOS), CD11b<sup>+</sup> CD11c<sup>+</sup> SiglecF<sup>+</sup> AMs, CD11b<sup>+</sup> Ly6C<sup>-</sup> Ly6G<sup>+</sup> neutrophils (NEU), and CD11c<sup>+</sup> MHCII<sup>hi</sup> dendritic cells (DC) in the lungs. **(E)** Expression of *Vhl* mRNA in sorted AMs. **(F–H)** Concentrations of TGFβ1, IL-33, and IL-6 in the BAL fluid. \*, P < 0.05; \*\*, P < 0.01 (Student's *t* test). Data are from one experiment representative of three independent experiments (mean and SEM of three to six mice per group).

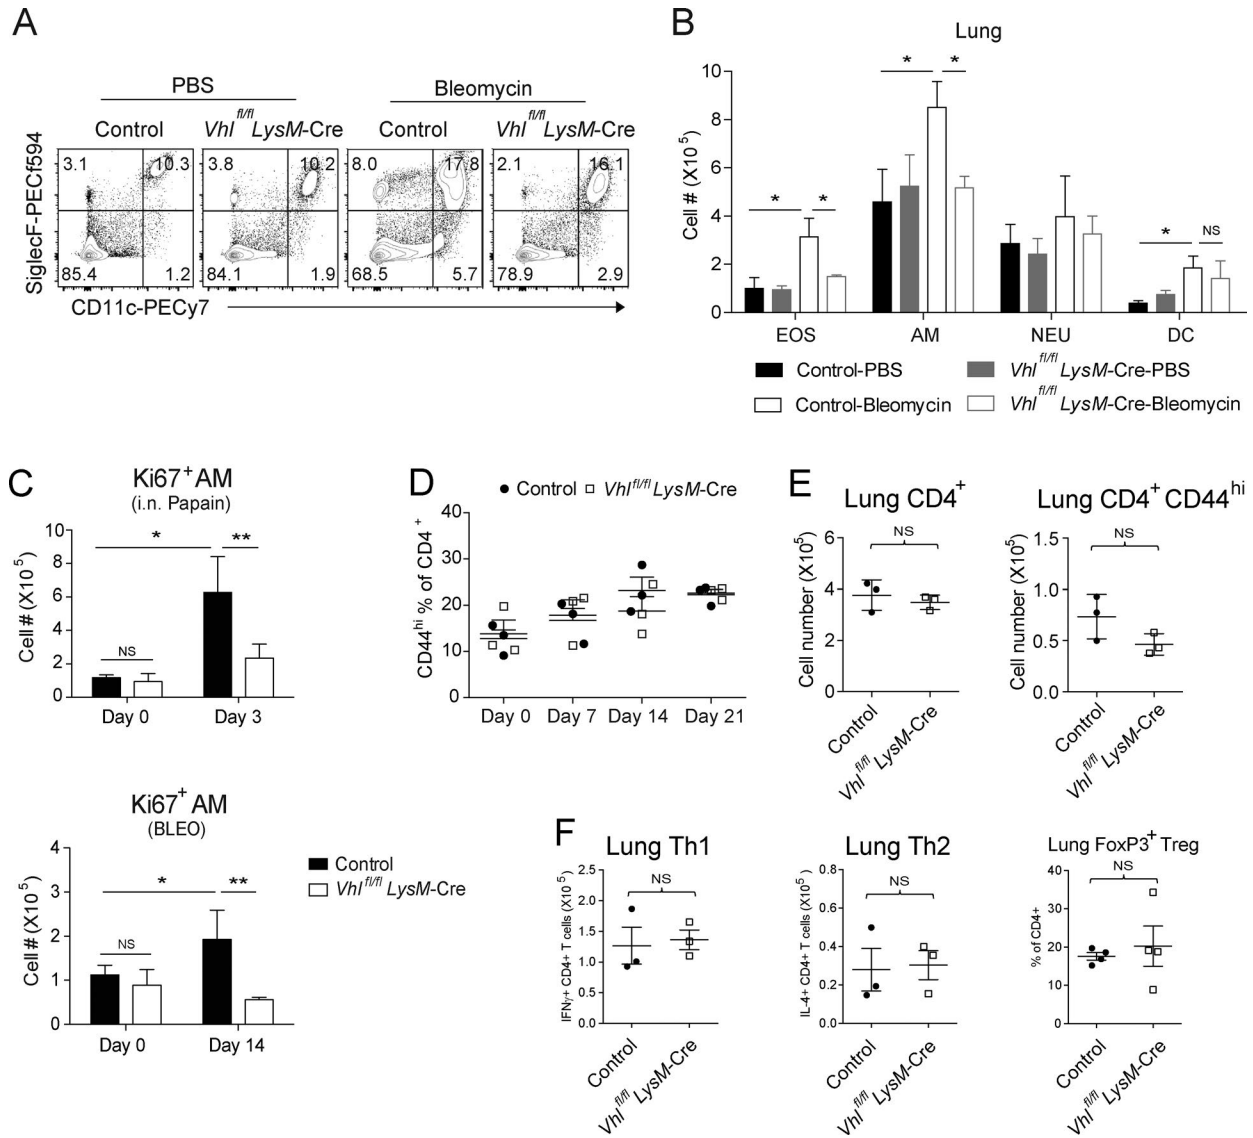

Figure S2. **Loss of myeloid-VHL ameliorates pulmonary fibrosis.** Related to Fig. 2. **(A)** Flow cytometry of CD45<sup>+</sup> cells in lungs. **(B)** Absolute numbers of CD11b<sup>+</sup> CD11c<sup>-</sup> SiglecF<sup>+</sup> eosinophils (EOS), CD11b<sup>+</sup> CD11c<sup>+</sup> SiglecF<sup>+</sup> AMs, CD11b<sup>+</sup> Ly6C<sup>-</sup> Ly6G<sup>+</sup> neutrophils (NEU), and CD11c<sup>+</sup> MHCII<sup>hi</sup> dendritic cells (DC) in the lungs. **(C)** Absolute numbers of Ki67<sup>+</sup> AMs in papain or bleomycin-treated mice, assessed on indicated time. **(D)** Frequencies of CD4<sup>+</sup> CD44<sup>hi</sup> T cells in bleomycin-challenged lungs, assessed on days 0, 7, 14, and 21. **(E)** Absolute numbers of lung CD4<sup>+</sup> T cells or CD4<sup>+</sup> CD44<sup>hi</sup> T cells, assessed on day 14 after bleomycin challenge. **(F)** Absolute numbers of lung CD4<sup>+</sup> IFN $\gamma$ <sup>+</sup> CD4<sup>+</sup> T cells (Th1) and IL-4<sup>+</sup> CD4<sup>+</sup> T cells (Th2) and frequencies of lung CD4<sup>+</sup> FoxP3<sup>+</sup> regulatory T cells (Treg), assessed on day 14 after bleomycin challenge. \*, P < 0.05; \*\*, P < 0.01 (Student's *t* test). Data are from one experiment representative of three independent experiments (mean and SEM of three to six mice per group).

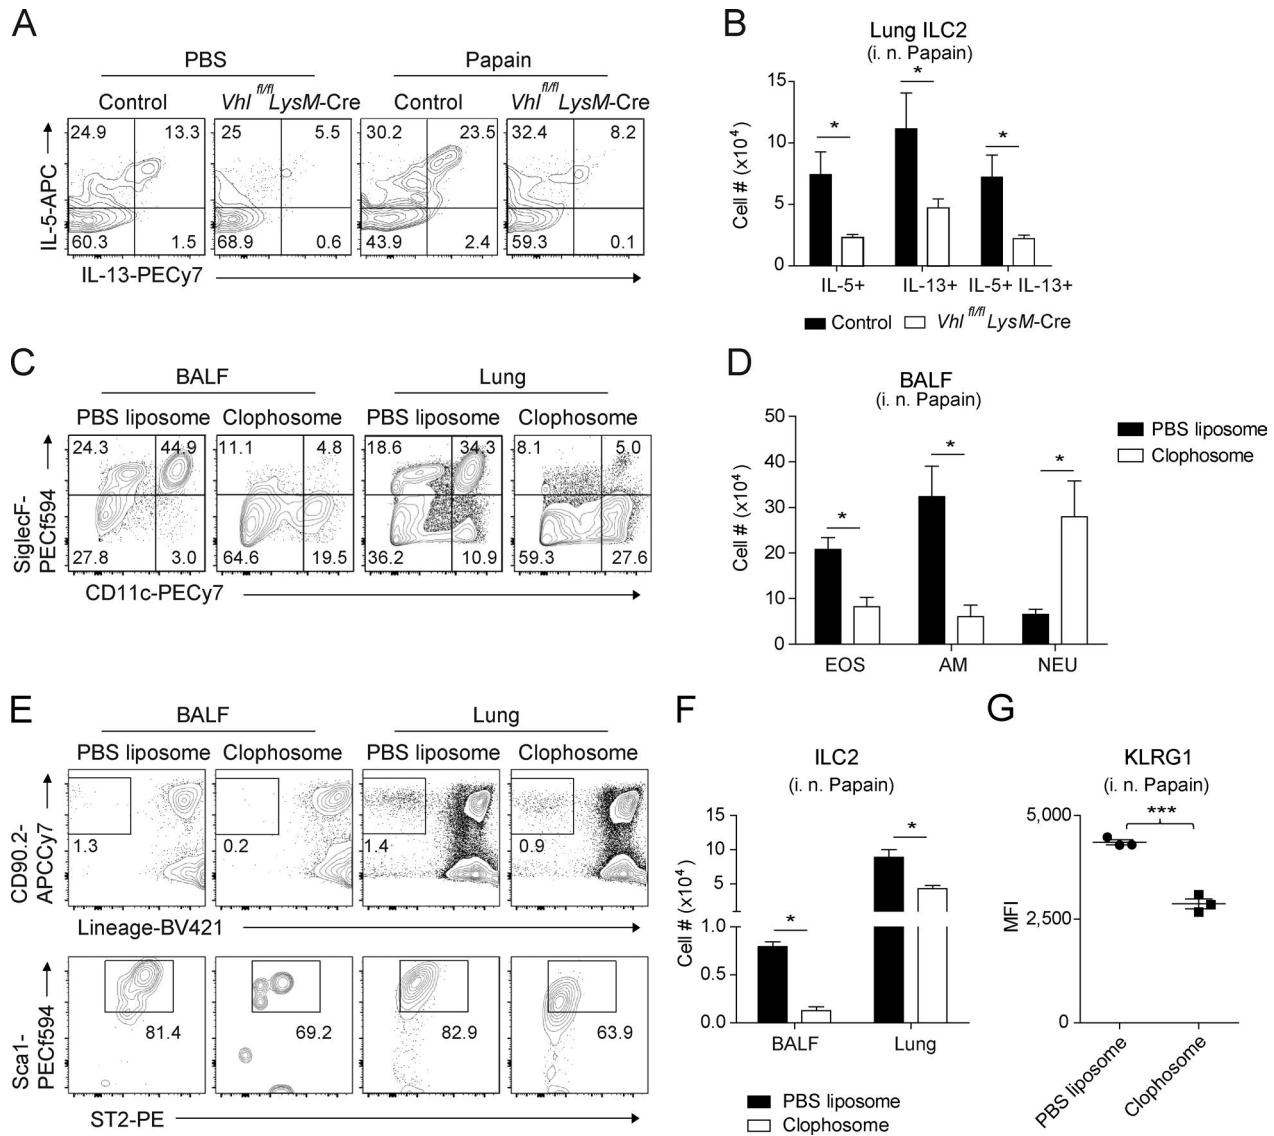

Figure S3. **VHL deficiency impairs lung ILC2 activation and function.** Related to Fig. 3. **(A)** IL-5 and IL-13 expression in CD45<sup>+</sup> Lineage<sup>-</sup> CD90.2<sup>+</sup> ST2<sup>+</sup> Sca1<sup>+</sup> lung ILC2s. **(B)** Absolute numbers of IL-5- or IL-13-producing lung ILC2s. **(C and D)** Flow cytometry and absolute numbers of myeloid cells in lungs of mice treated with control or clodronate liposomes (clophosome) followed by intranasal papain. **(E and F)** Flow cytometry and total numbers of ILC2s. BALF, BAL fluid. **(G)** MFI of KLRG1 in lung ILC2s. \*, P < 0.05; \*\*\*, P < 0.001 (Student's *t* test). Data are from one experiment representative of three independent experiments (mean and SEM of three to six mice per group).

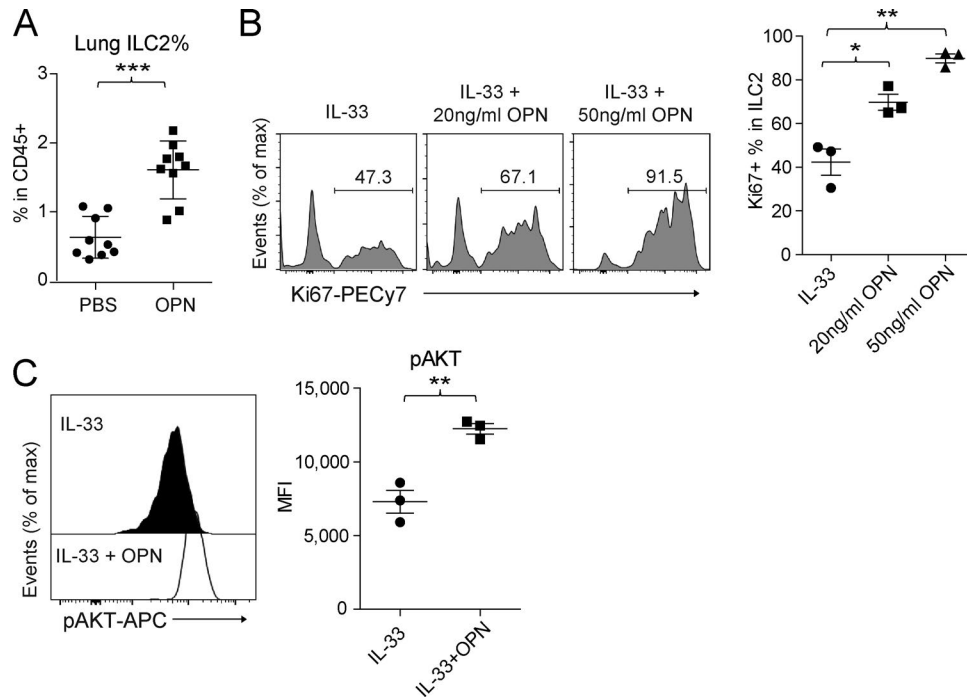

Figure S4. **Osteopontin supports ILC2 expansion.** Related to Fig. 4. **(A)** Frequencies of CD45<sup>+</sup> Lineage<sup>-</sup> ST2<sup>+</sup> ICOS<sup>+</sup> lung ILC2s from *Rag1*<sup>-/-</sup> mice treated with 200 ng OPN for 3 consecutive days. **(B)** Ki67 expression of sorted bone marrow ILC2s cultured in the presence of IL-33 and IL-7, treated without or with mouse recombinant osteopontin (OPN) for 5 d. **(C)** Histogram and MFI of phosphorylated AKT in ILC2s as shown in B. \*, P < 0.05; \*\*, P < 0.01; \*\*\*, P < 0.001 (Student's *t* test). Data are combined from three independent experiments (A) or from one experiment representative of two independent experiments (B and C; mean and SEM of cells from two mice per group).

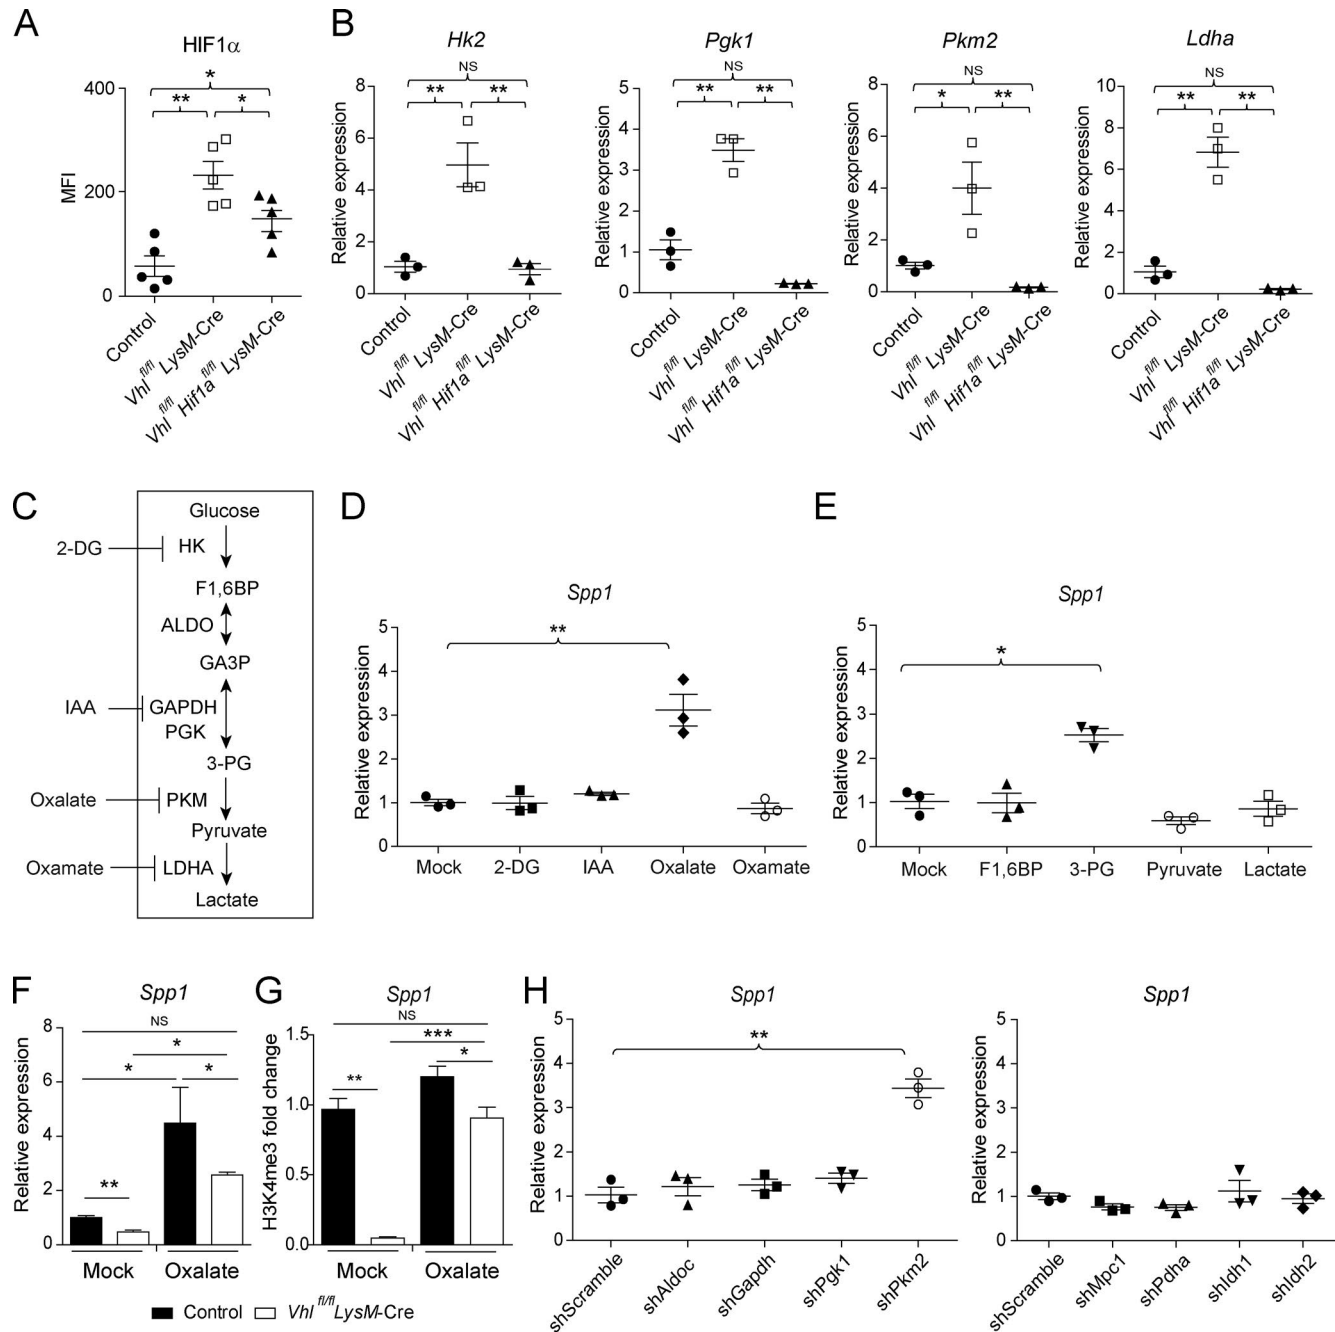

Figure S5. **Control of osteopontin expression by VHL-HIF1 $\alpha$ -glycolysis pathway.** Related to Figs. 5 and 6. **(A)** HIF1 $\alpha$  expression in CD45<sup>+</sup> CD11c<sup>+</sup> SiglecF<sup>+</sup> AMs. **(B)** mRNA levels of genes encoding glycolytic enzymes in sorted AMs. **(C)** Illustration of the glycolytic pathway and the targets of the indicated glycolytic inhibitors. 2-DG, 2-deoxyglucose; IAA, iodoacetate. **(D and E)** *Spp1* mRNA levels in WT BMDMs treated without (mock) or with small molecular inhibitors targeting indicated glycolytic enzymes or indicated glucose intermediates for 24 h. **(F and G)** *Spp1* mRNA expression and H3K4me3 levels in control and VHL-deficient BMDMs treated without or with oxalate for 24 h. **(H)** *Spp1* mRNA levels in WT BMDMs transduced with retrovirus expressing scrambled shRNA (shScramble) or shRNA targeting indicated glycolytic enzymes or TCA cycle enzymes. \*, P < 0.05; \*\*, P < 0.01; \*\*\*, P < 0.001 (Student's *t* test). Data represent the mean and SEM from three independent experiments.

Table S1. List of oligonucleotide sequences for shRNA knockdown

| Gene            | shRNA oligos (5'→3')                                                                                |
|-----------------|-----------------------------------------------------------------------------------------------------|
| <i>Scramble</i> | TGCTGTTGACAGTGAGCGACCATAGATGTTACCCCTTTATTTAGTGAAGCCACAGATGTAATAAAGGGTAACATCTATGGCTGCCTACTGCCTCGGA   |
| <i>Aldoc</i>    | TGCTGTTGACAGTGAGCGCTCTCTCAACCTCAATGCCATCTAGTGAAGCCACAGATGTA GATGGCATTGAGGTTGAGAGAG TGCCTACTGCCTCGGA |
| <i>Gapdh</i>    | TGCTGTTGACAGTGAGCGAACTGAGCATCTCCCTCACAAATTAGTGAAGCCACAGATGTAATTGTGAGGGAGATGCTCAGTTTGCTACTGCCTCGGA   |
| <i>Pgk1</i>     | TGCTGTTGACAGTGAGCGACTAGACAAAGTCAATGAGATGTAGTGAAGCCACAGATGTA CATCTATTGACTTTGTCTAGT TGCCTACTGCCTCGGA  |
| <i>Pkm2</i>     | TGCTGTTGACAGTGAGCGCGCTTTGCATCTGATCCATTCTAGTGAAGCCACAGATGTA GAATGGGATCAGATGCAAAGCG TGCCTACTGCCTCGGA  |
| <i>Mpc1</i>     | TGCTGTTGACAGTGAGCGCGCTATCAATGACATGAAGAAATAGTGAAGCCACAGATGTA TTTCTTCATGTCATTGATAGCG TGCCTACTGCCTCGGA |
| <i>Pdha</i>     | TGCTGTTGACAGTGAGCGAGCGGATCAGCTGTATAAGCAGTAGTGAAGCCACAGATGTA CTGCTTATACAGCTGATCCGCT TGCCTACTGCCTCGGA |
| <i>Idh1</i>     | TGCTGTTGACAGTGAGCGCTCTGACTACTTGAATACATTTTAGTGAAGCCACAGATGTA AAATGTATTCAAGTAGTCAGAG TGCCTACTGCCTCGGA |
| <i>Idh2</i>     | TGCTGTTGACAGTGAGCGCGTGGGAAGCTGGATGGGAAGTGAAGCCACAGATGTA GTTCCATCCAGCTTCCCACGG TGCCTACTGCCTCGGA      |

Table S2. Primers used for quantitative real-time PCR

| Name         | Forward primer (5'→3')   | Reverse primer (5'→3')  |
|--------------|--------------------------|-------------------------|
| <i>Vhl</i>   | AAGAGCACGCAGCTTAGGAG     | TTTCTGAGTCCTGGGATTG     |
| <i>Hk2</i>   | GGAGAGCACGTGTGACGAC      | GATGCGACAGGCCACAGCA     |
| <i>Aldoc</i> | GGAAAAGTGAGCTGTGCTGTG    | GCTGCCTACGGACTCATCTG    |
| <i>Pgk1</i>  | GATTCAGGTTACGTCACGCT     | GACGGATTCTGTCGACAGAG    |
| <i>Pkm2</i>  | TTGCAGCTATTCGAGGAATCCG   | CACGATAATGGCCCCACTGC    |
| <i>Ldha</i>  | CACAAGCAGGTGGTGGACAG     | AACTGCAGCTCCTTCTGGATTG  |
| <i>Spp1</i>  | GCCTGTTTGGCATTGCCTCCTC   | CACAGCATTCTGTGGCGAAGG   |
| <i>Tgfb1</i> | AGCTGCGCTTGCAGAGATTA     | AGCCCTGTATTCCGTCTCT     |
| <i>Actb</i>  | GCTGTGCTGTCCCTGTATGCCTCT | CCTCTCAGCTGTGGTGGTGAAGC |

Table S3. Primers used for ChIP assay

| Name                  | Forward primer (5'→3')   | Reverse primer (5'→3') |
|-----------------------|--------------------------|------------------------|
| <i>Spp1-I</i>         | TCCTTGCTCTGCTGAAGAT      | CCAGACTGCCTTTCAGTCTT   |
| <i>Spp1-II</i>        | CAGAGCAACAAGGTTACGA      | CAGTTGGGGCAACAGAAAGT   |
| <i>Spp1-III</i>       | TGATGCTCTCCGGGATTCT      | CAGGAGGTGGAGTGTGTG     |
| <i>Spp1-IV</i>        | CTGTTTGGCATTGCCTCCTC     | TGCGTGTGAGTGTGCTAAAG   |
| <i>Spp1-V</i>         | TGCACCCAGATCCTATAGCC     | CTGTGGCGCAAGGAGATTC    |
| <i>Spp1-VI</i>        | TGCACCCAGATCCTATAGCC     | CTGTGGCGCAAGGAGATTC    |
| <i>Spp1</i>           | TCTGAGGGTGAGTCCAGAGA     | ACCTGCAATGTACTGACCA    |
| <i>Tgfb1-promoter</i> | TGCACGCAGATACCATCTACA    | GCTTCACTGCTGTGCCATTA   |
| <i>Tgfb1-exon</i>     | GTGGCCAGATCCTGTCCAAACTAA | ATTAGCACGCGGGTGACCTTTA |

Table S4. **Antibody list**

| <b>Antibody</b>         | <b>Clone</b> | <b>Vendor</b>  |
|-------------------------|--------------|----------------|
| <b>FACS</b>             |              |                |
| Anti-CD3 $\epsilon$     | 145-2C11     | BioLegend      |
| Anti-CD4                | GK1.5        | BioLegend      |
| Anti-CD8 $\alpha$       | 53-6.7       | BioLegend      |
| Anti-CD11b              | M1/70        | BioLegend      |
| Anti-CD11c              | N418         | BioLegend      |
| Anti-CD16/32            | 93           | eBioscience    |
| Anti-CD19               | 6D5          | BioLegend      |
| Anti-CD25               | PC61.5       | eBioscience    |
| Anti-CD44               | IM7          | eBioscience    |
| Anti-CD45               | 30-F11       | BioLegend      |
| Anti-CD62L              | MEL-14       | eBioscience    |
| Anti-CD90.2             | 53-2.1       | eBioscience    |
| Anti-ICOS               | C398.4A      | eBioscience    |
| Anti-F4/80              | BM8          | eBioscience    |
| Anti-Ly6C               | HK1.4        | BioLegend      |
| Anti-Ly6G               | 1A8          | BioLegend      |
| Anti-Sca1               | D7           | BD Biosciences |
| Anti-Gr1                | RB6-8C5      | BioLegend      |
| Anti-MHCII              | M5/114.15.2  | BioLegend      |
| Anti-SiglecF            | E50-2440     | BD Biosciences |
| Anti-ST2                | RMST2-2      | eBioscience    |
| Anti-IL-7Ra             | A7R34        | eBioscience    |
| Anti-B220               | RA3-6B2      | BioLegend      |
| Anti-NK1.1              | PK136        | BioLegend      |
| Anti-KLRG1              | 2F1          | eBioscience    |
| Anti-TCR $\beta$        | H57-597      | BioLegend      |
| Anti-TCR $\gamma\delta$ | GL3          | BioLegend      |
| Anti-TER119             | TER-119      | BioLegend      |
| Anti-FoxP3              | FJK-16s      | eBioscience    |
| Anti-HIF1 $\alpha$      | 241812       | R&D Systems    |
| Anti-Ki67               | SolA15       | eBioscience    |
| Anti-IFN $\gamma$       | XMG1.2       | eBioscience    |
| Anti-IL-4               | 11B11        | eBioscience    |
| Anti-IL-5               | TRFK5        | BioLegend      |
| Anti-IL-13              | eBio13A      | eBioscience    |
| Anti-pAKT1              | SDRNR        | eBioscience    |
| <b>ChIP</b>             |              |                |
| Anti-H3K4me3            | ab8580       | Abcam          |
| <b>Neutralization</b>   |              |                |
| Anti-Osteopontin        | AF808        | R&D Systems    |
